# Supplementary material for: Unraveling the Mechanisms of Sensitivity to Anti-FGF Therapies in Imatinib-Resistant Gastrointestinal Stromal Tumors (GIST) Lacking Secondary KIT Mutations
Source: MDPI journal article supplement (doi:10.3390/cancers15225354), 2023-11-09

Uncropped file (Original Images for blots)

Figure 2A. GIST-R1

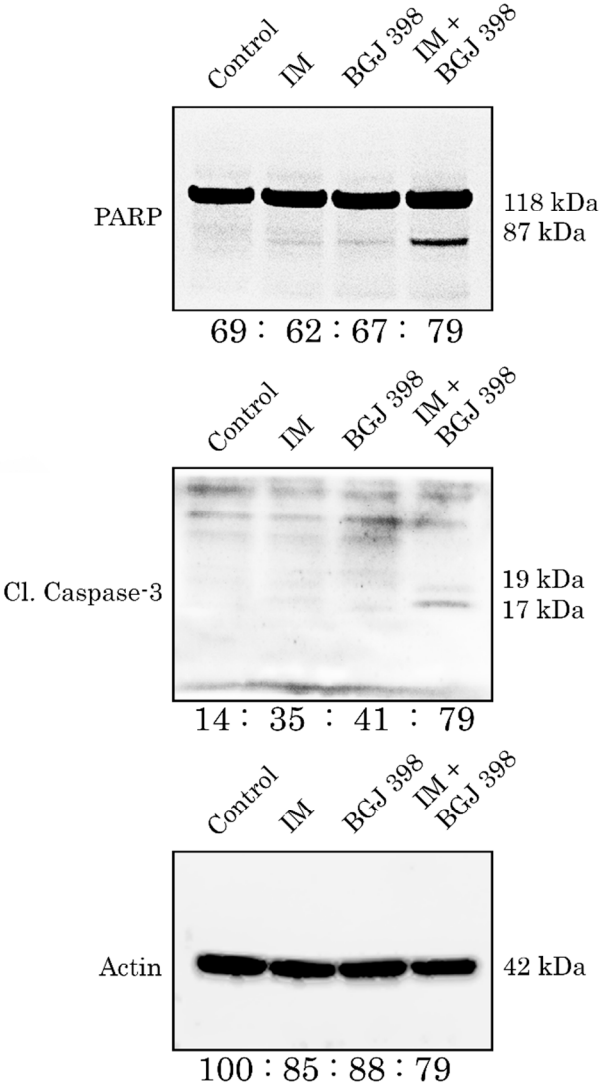

GIST-R2

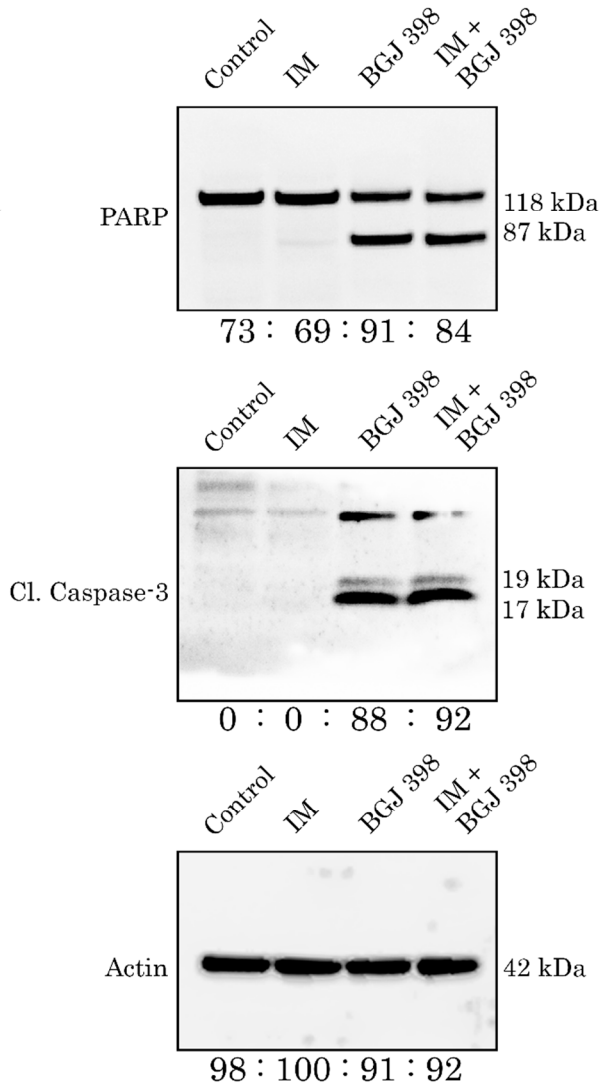

Figure 3 (left).

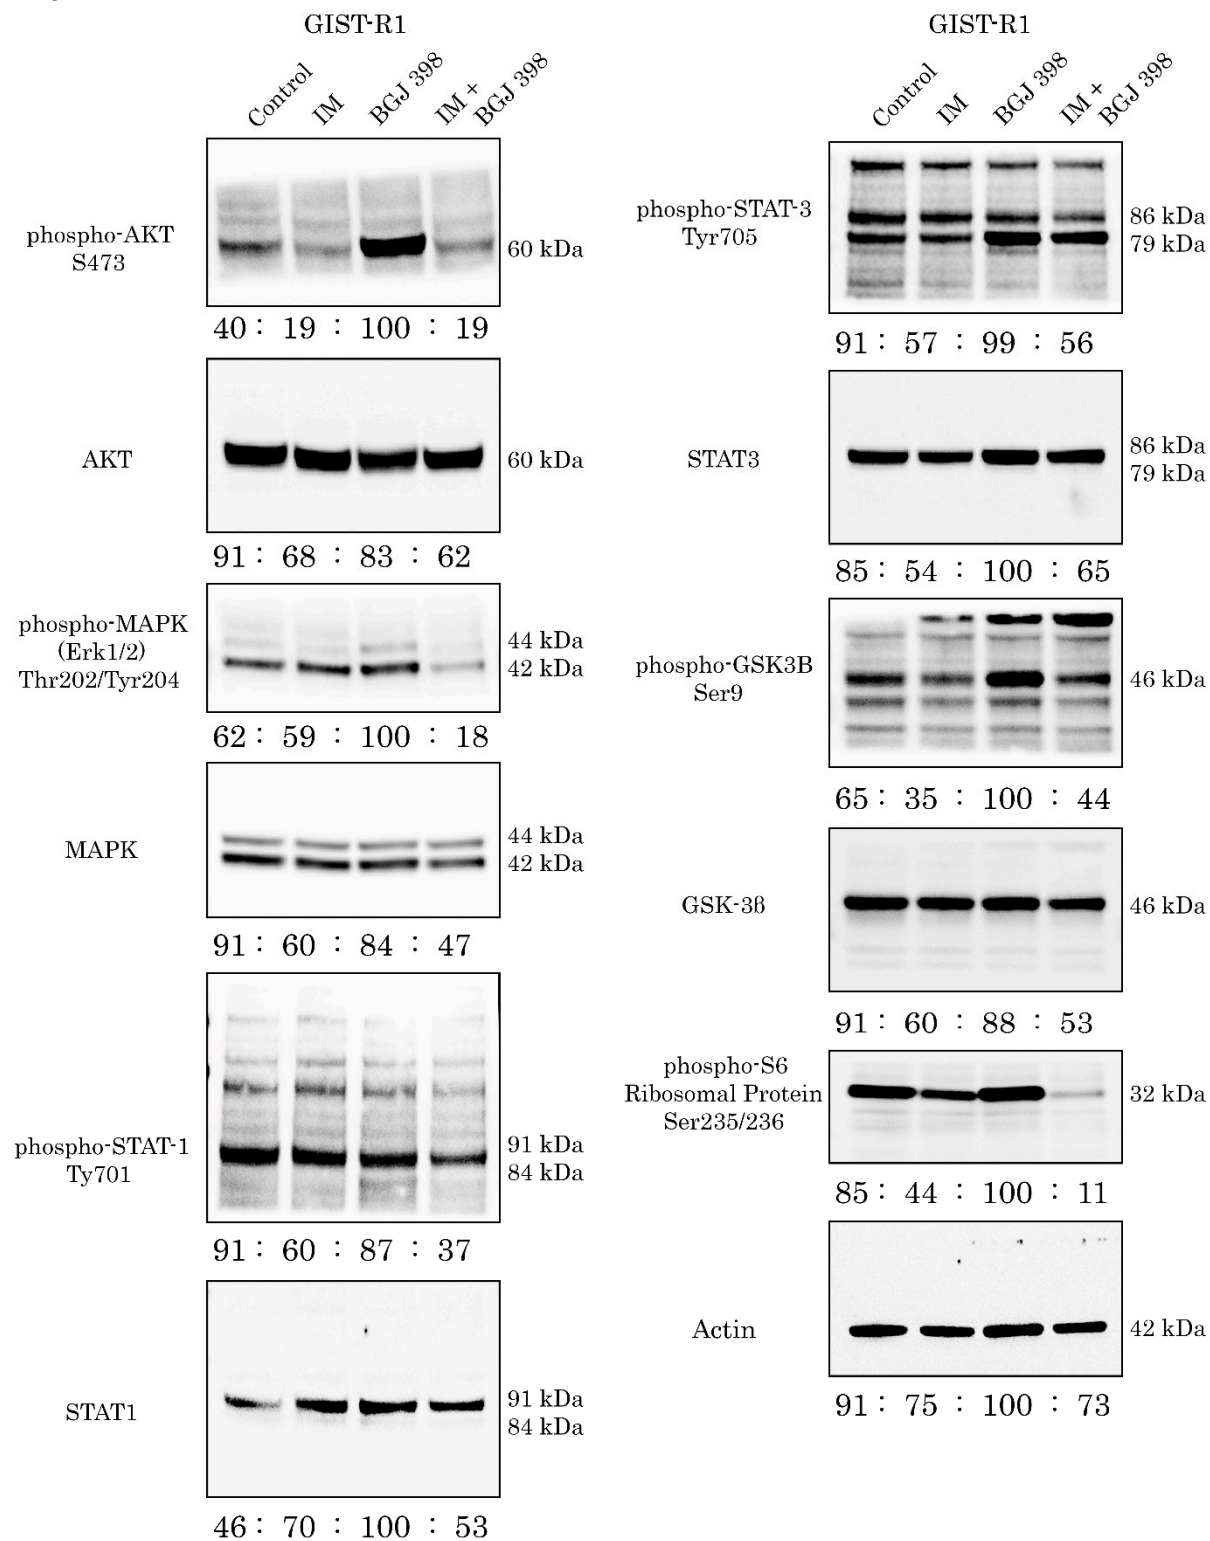

Figure 3 (right).

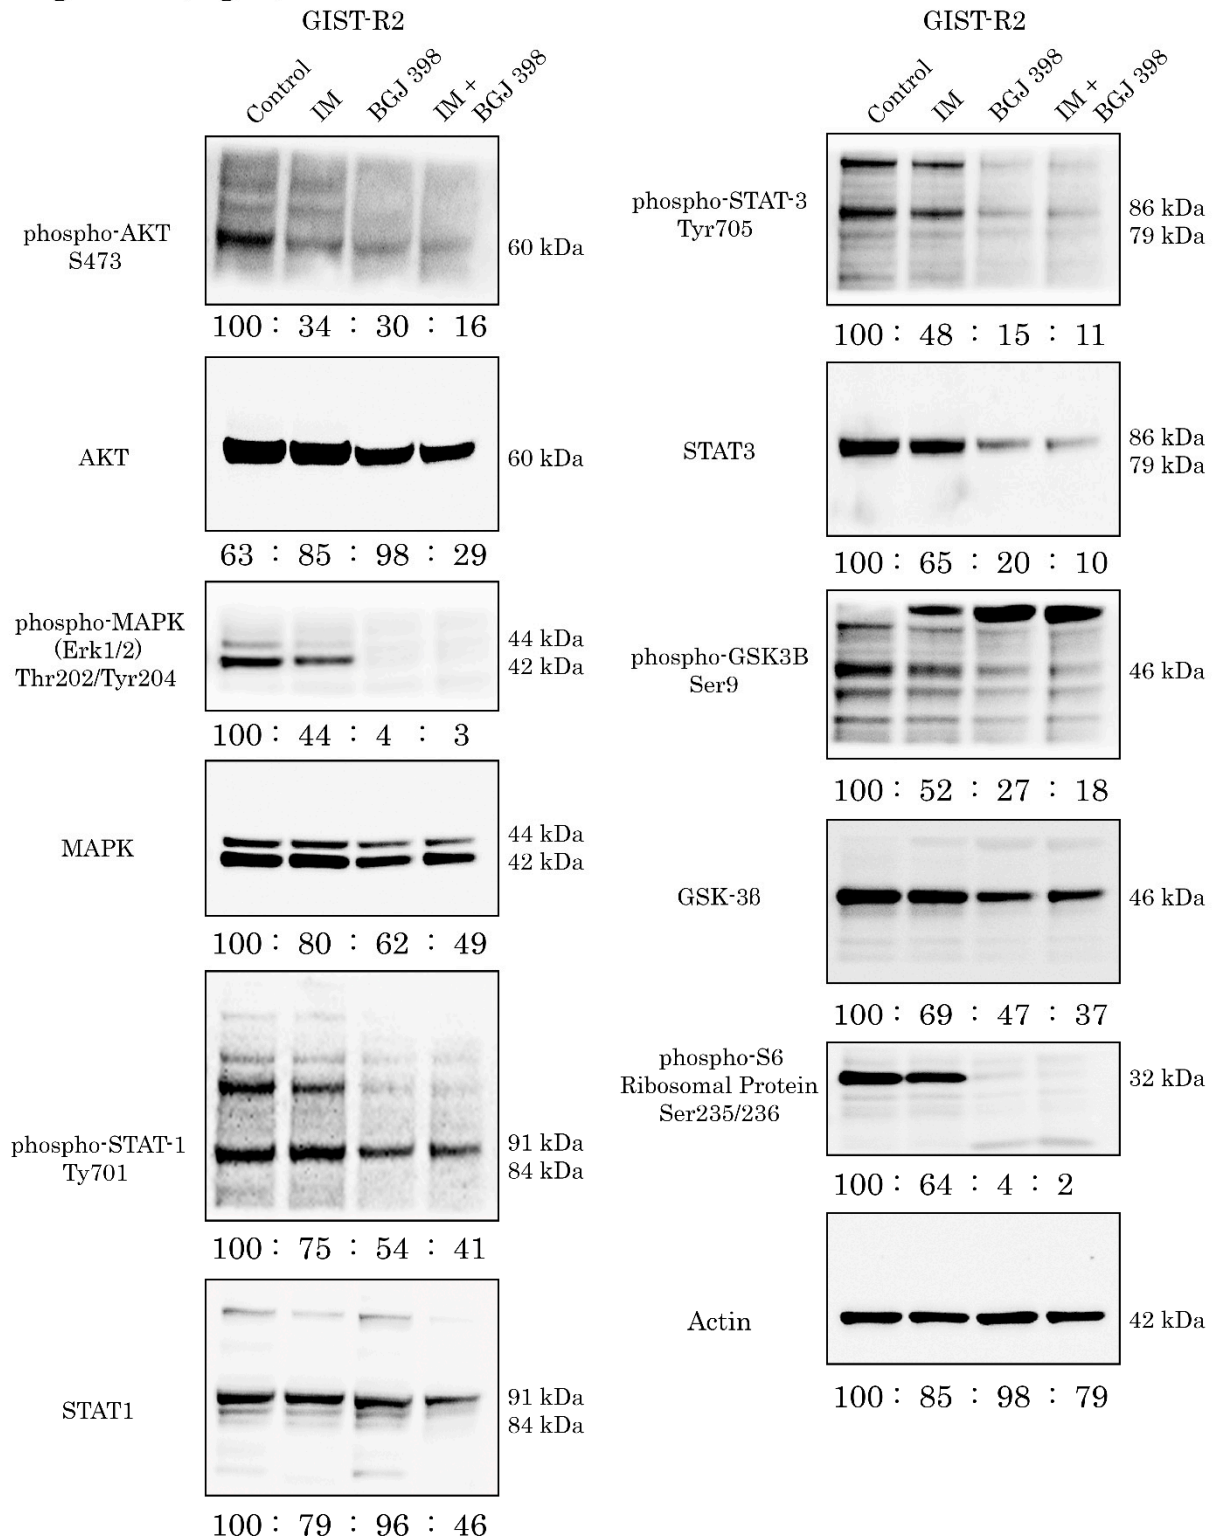

Figure 4 A.

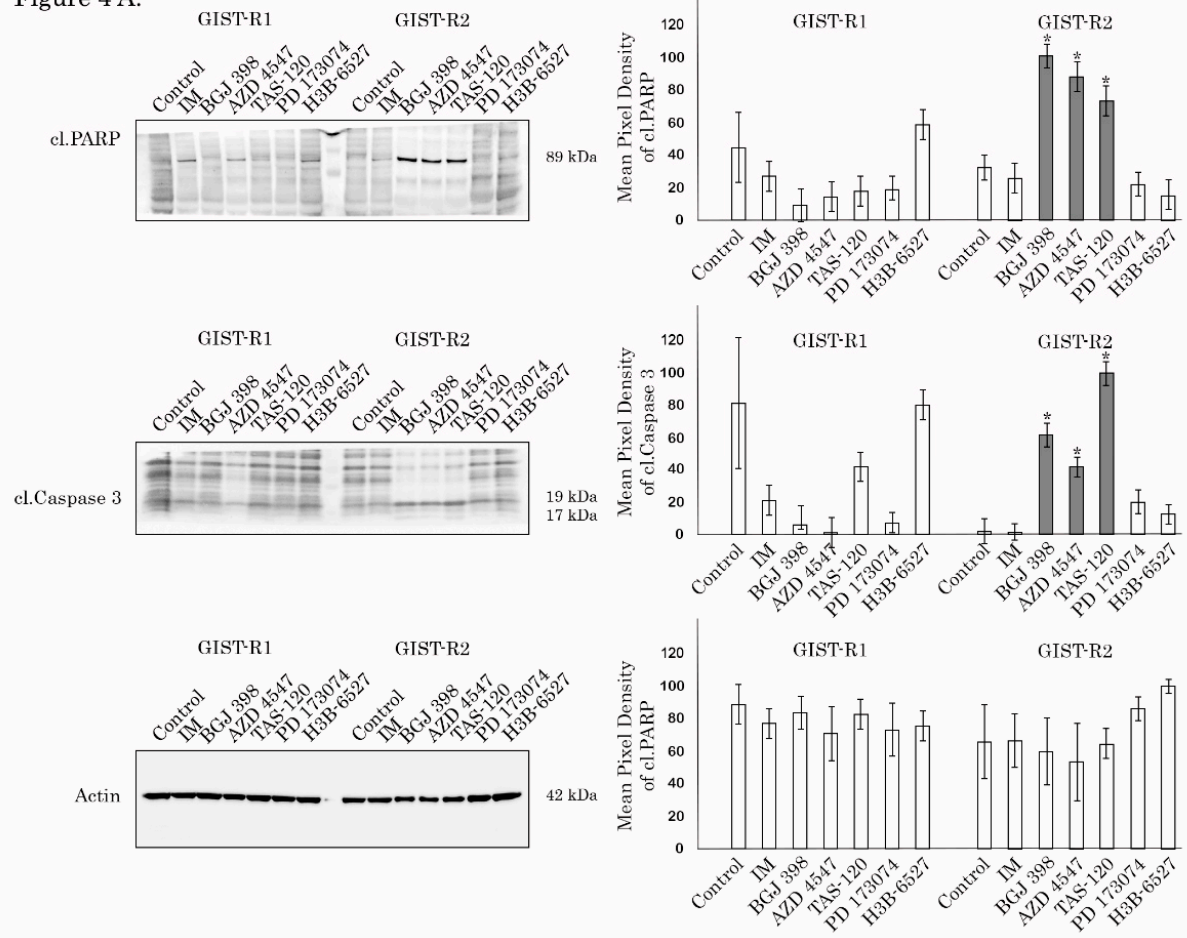

Figure 8A.

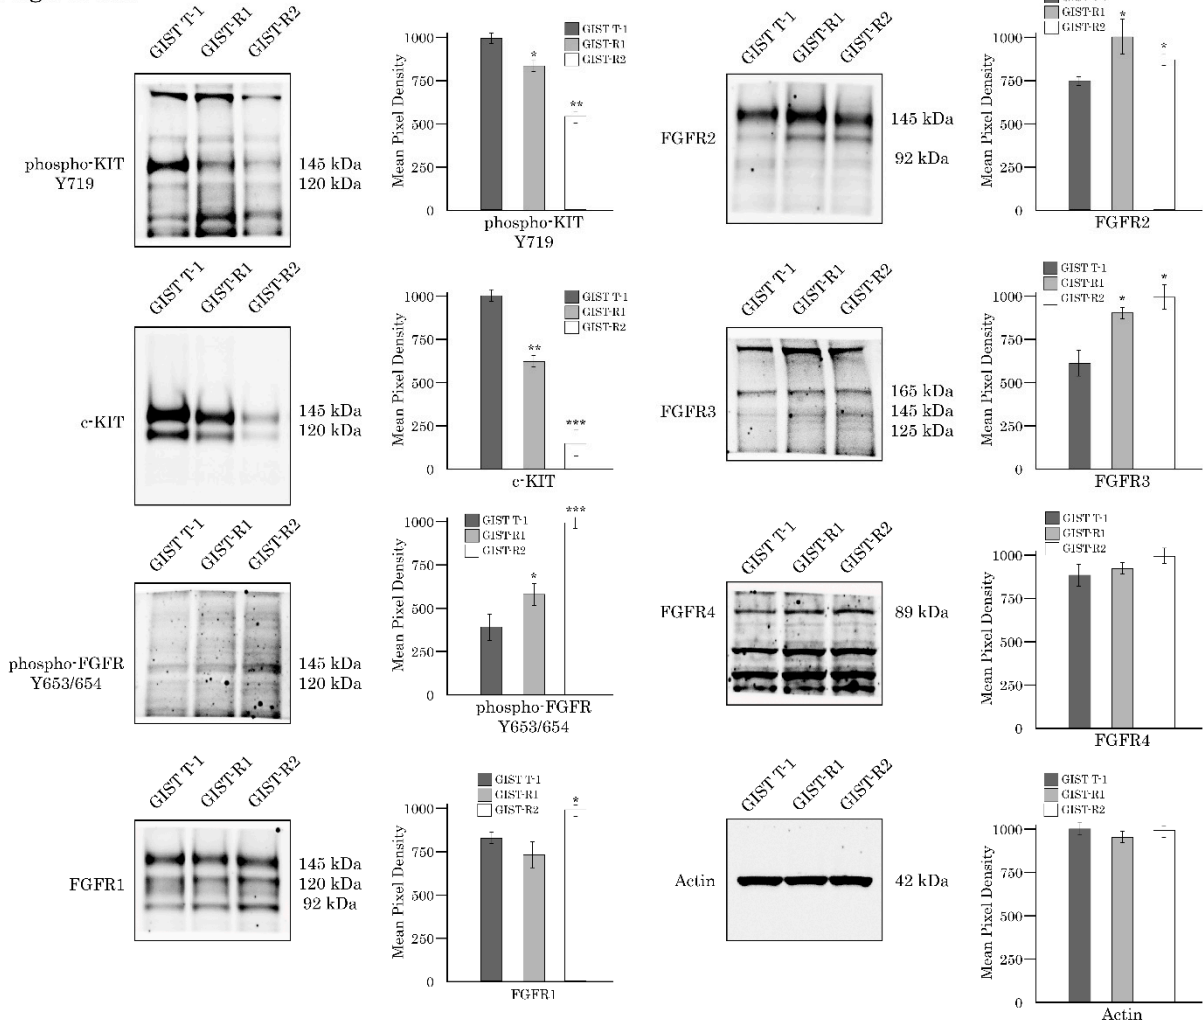

Figure 8B.

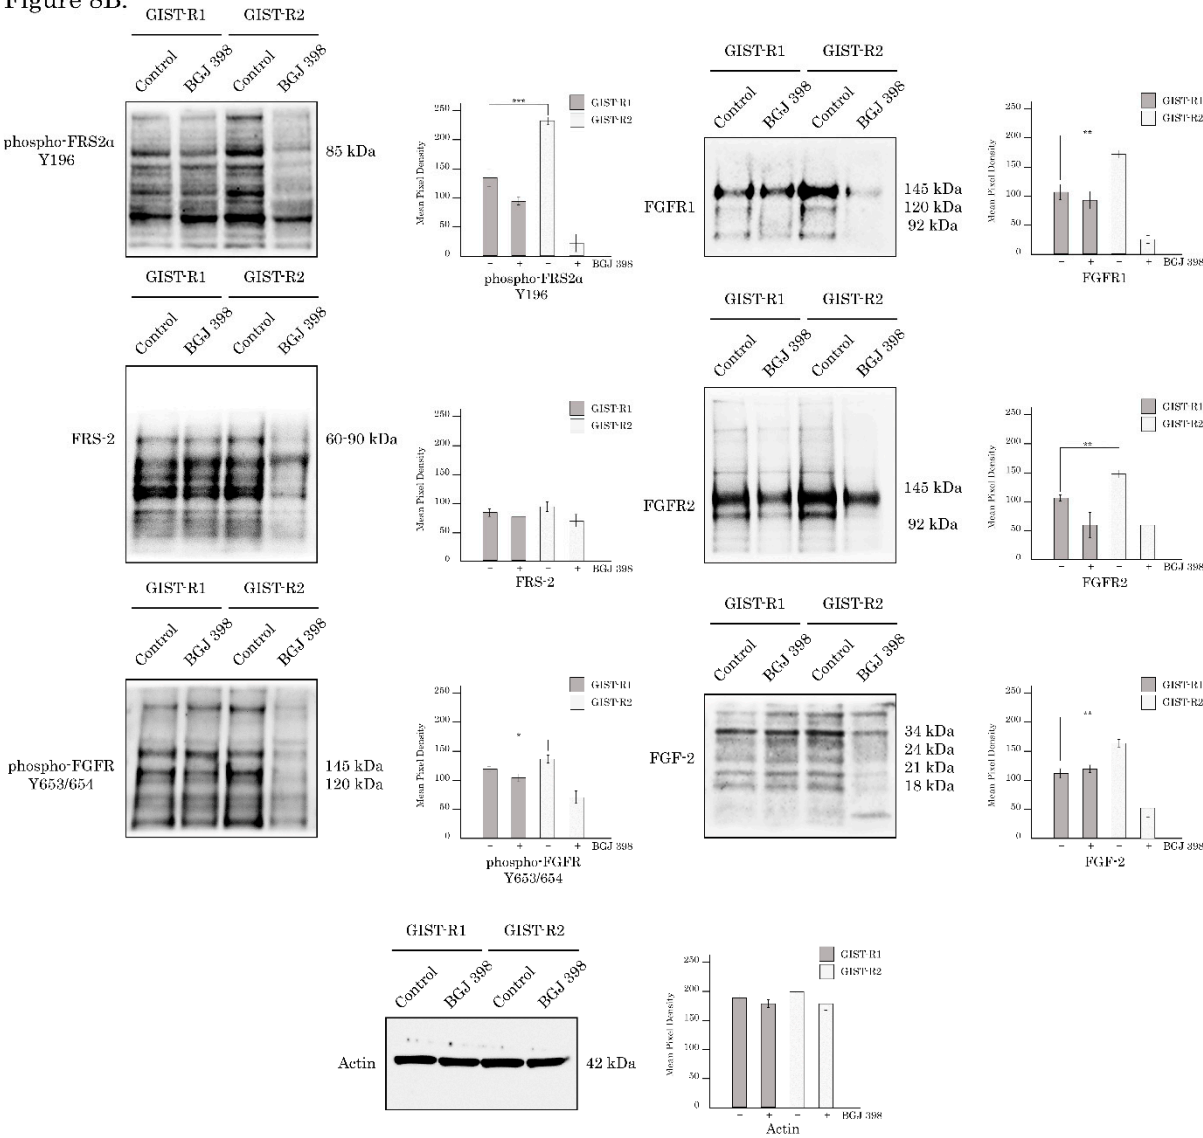

Figure 11A.

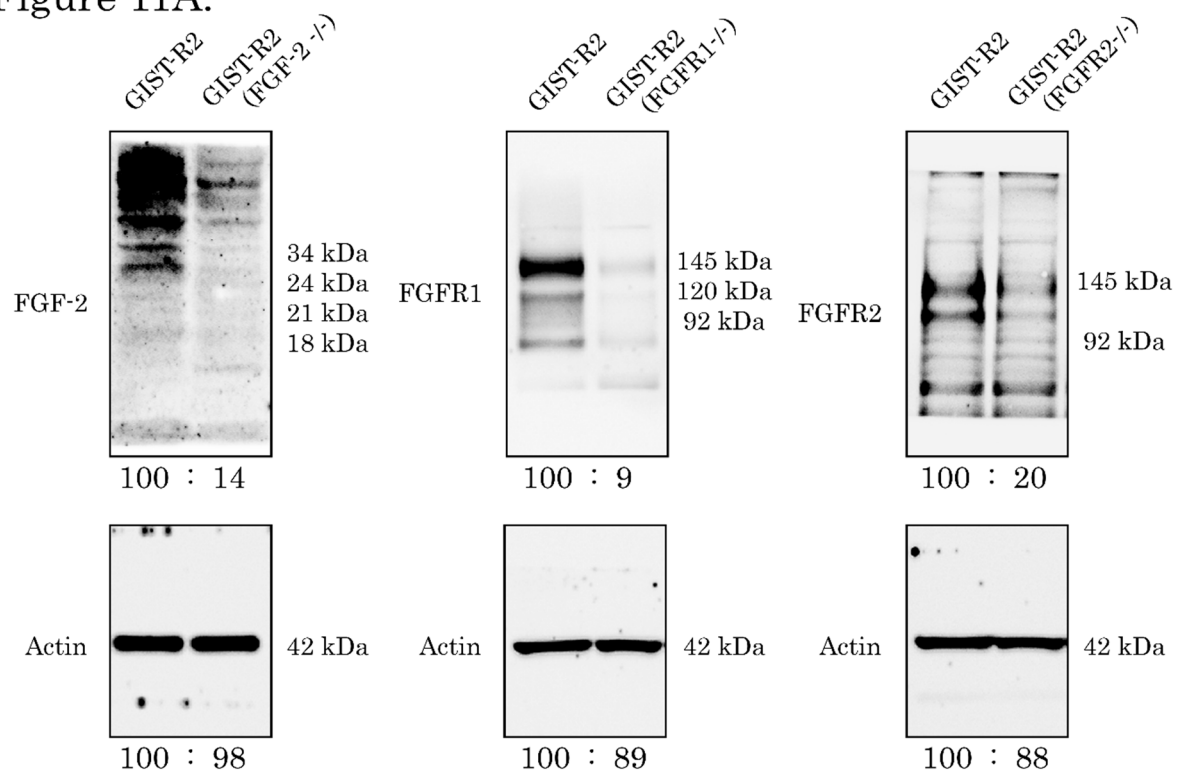

Figure 12C.

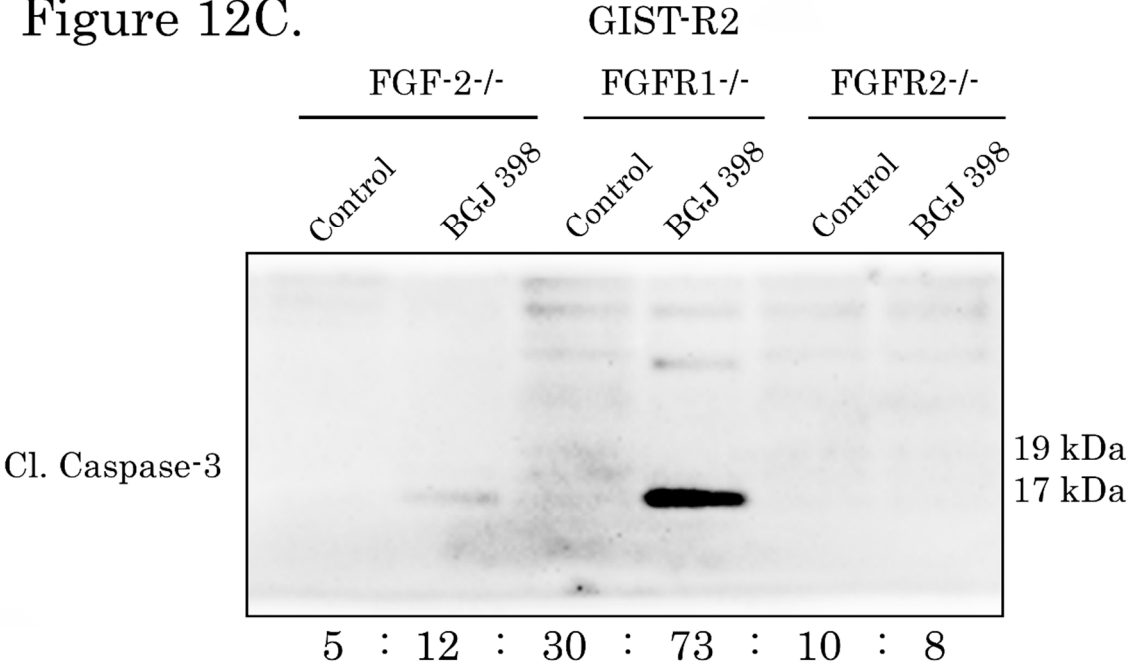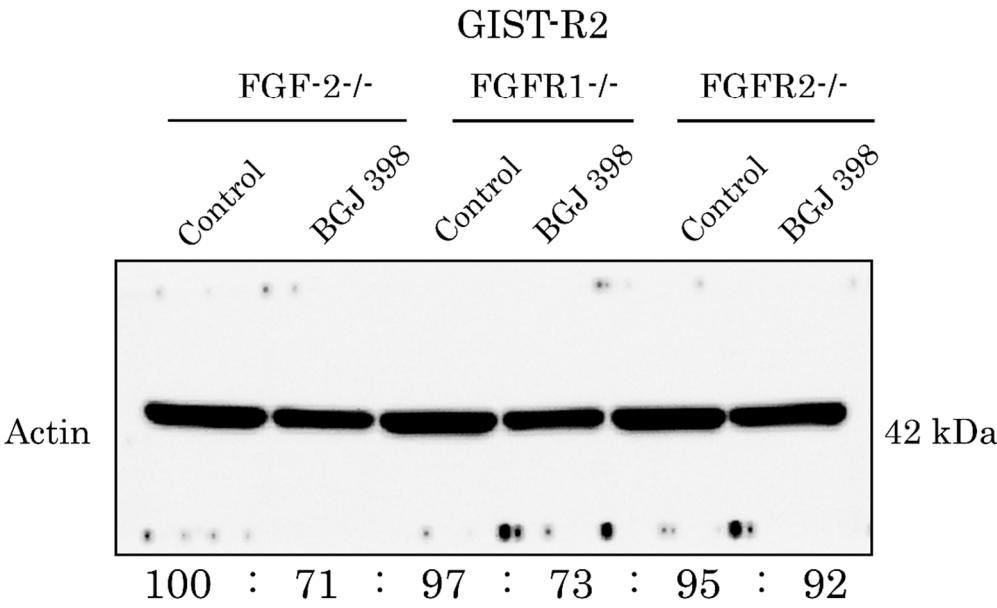



## Supplementary figure 1B.

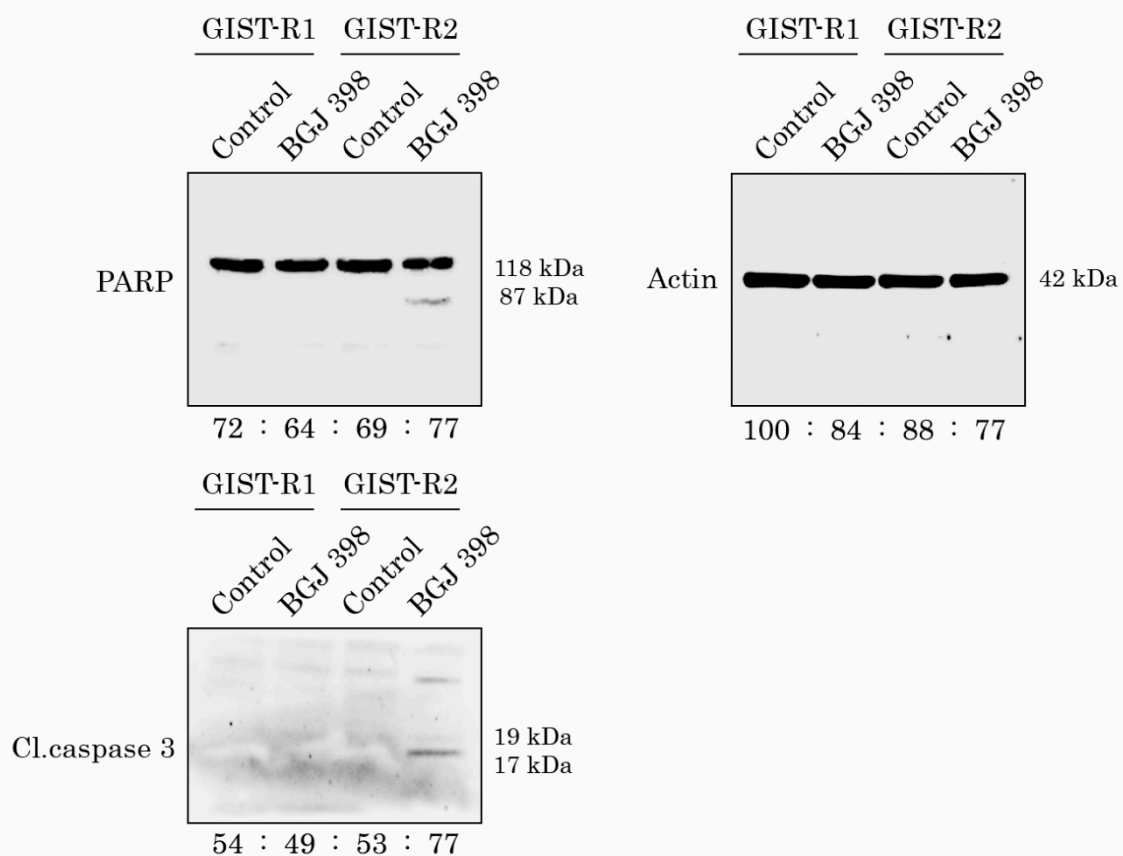

## Supplementary figure 8A.

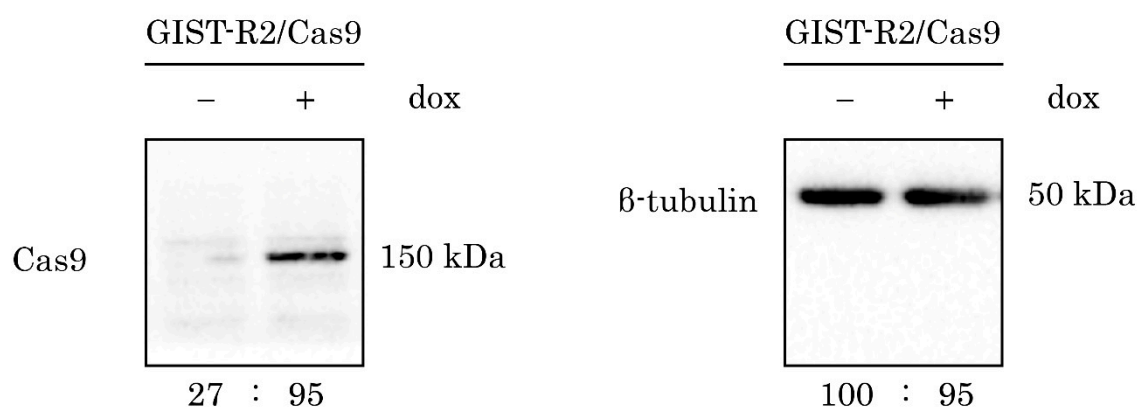

Supplementary figure 8B.

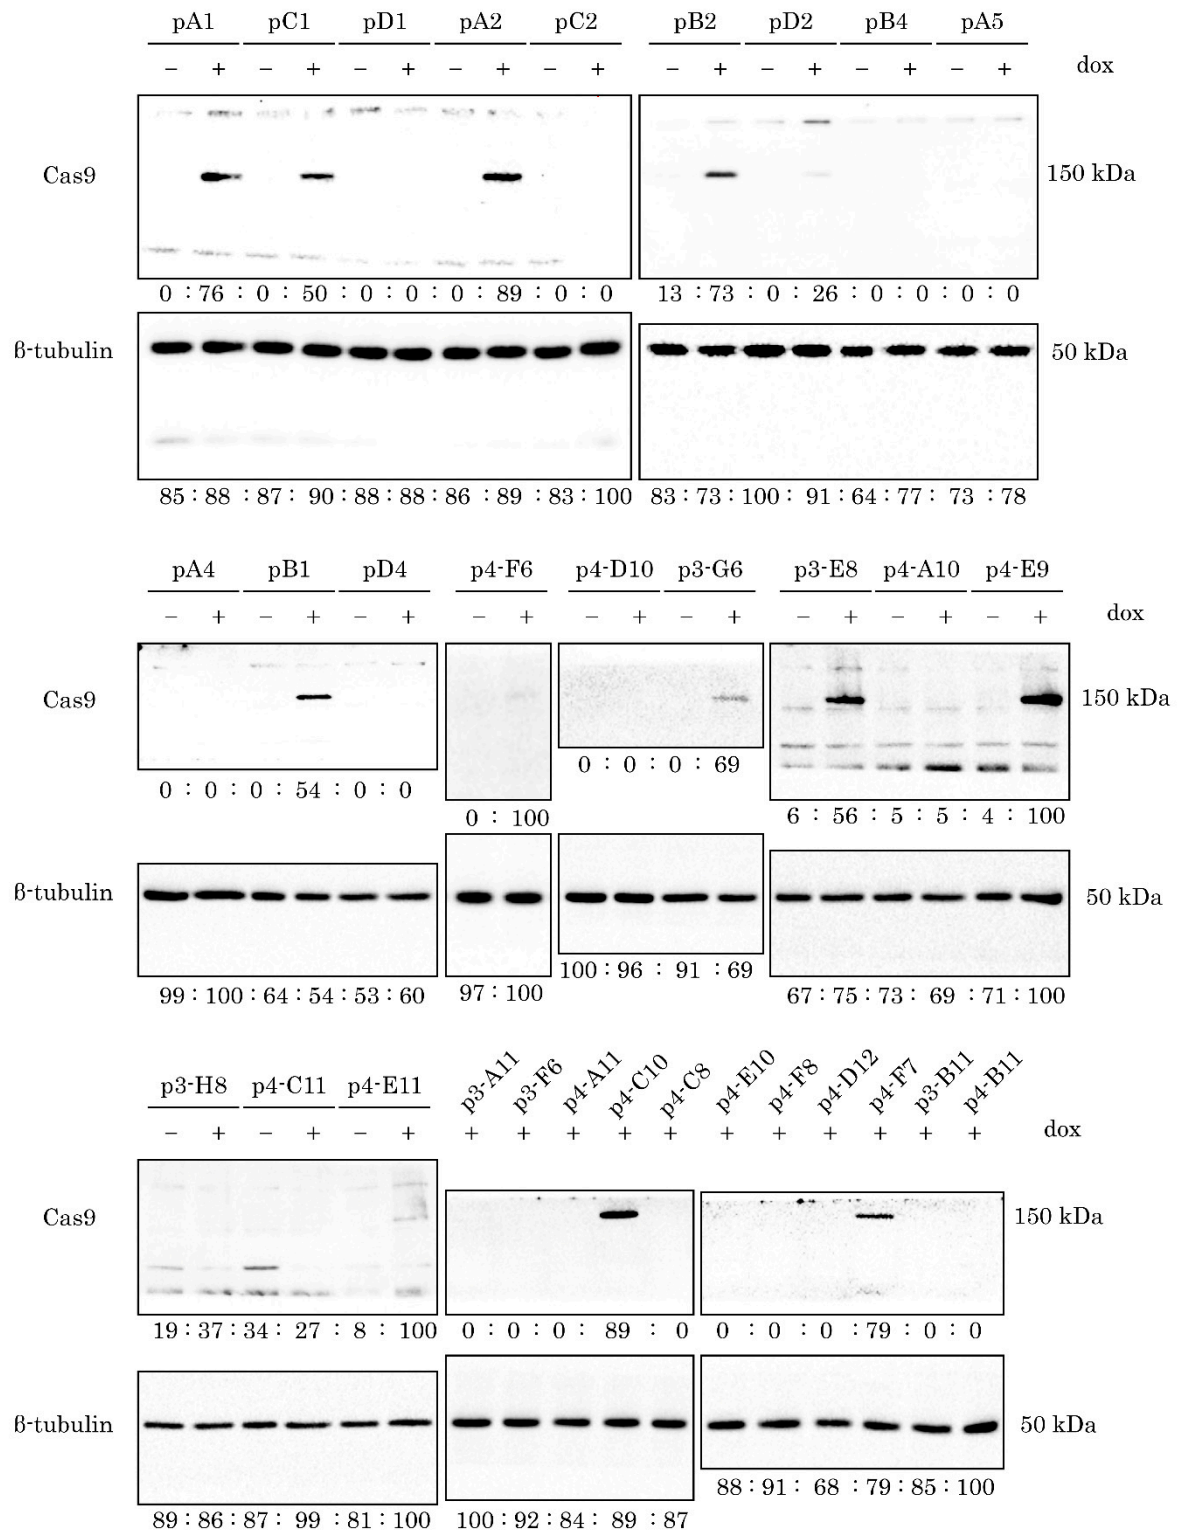

Supplementary figure 8C.

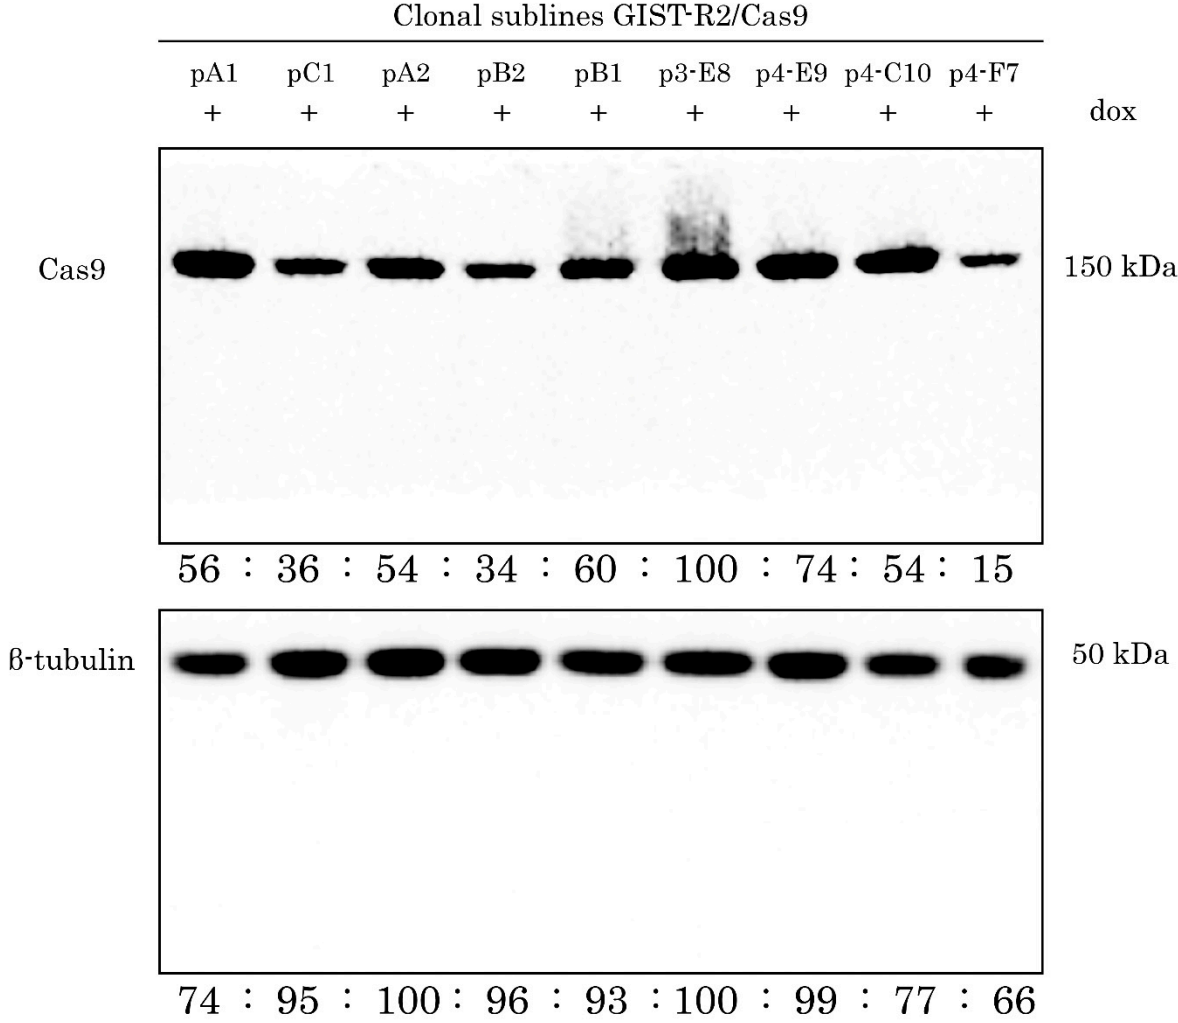

Supplement: s1 [file s1]
