# Supplementary material for: Unraveling the Mechanisms of Sensitivity to Anti-FGF Therapies in Imatinib-Resistant Gastrointestinal Stromal Tumors (GIST) Lacking Secondary KIT Mutations
Source: MDPI journal article supplement (doi:10.3390/cancers15225354), 2023-11-09
Supplement: s1 [file s1]

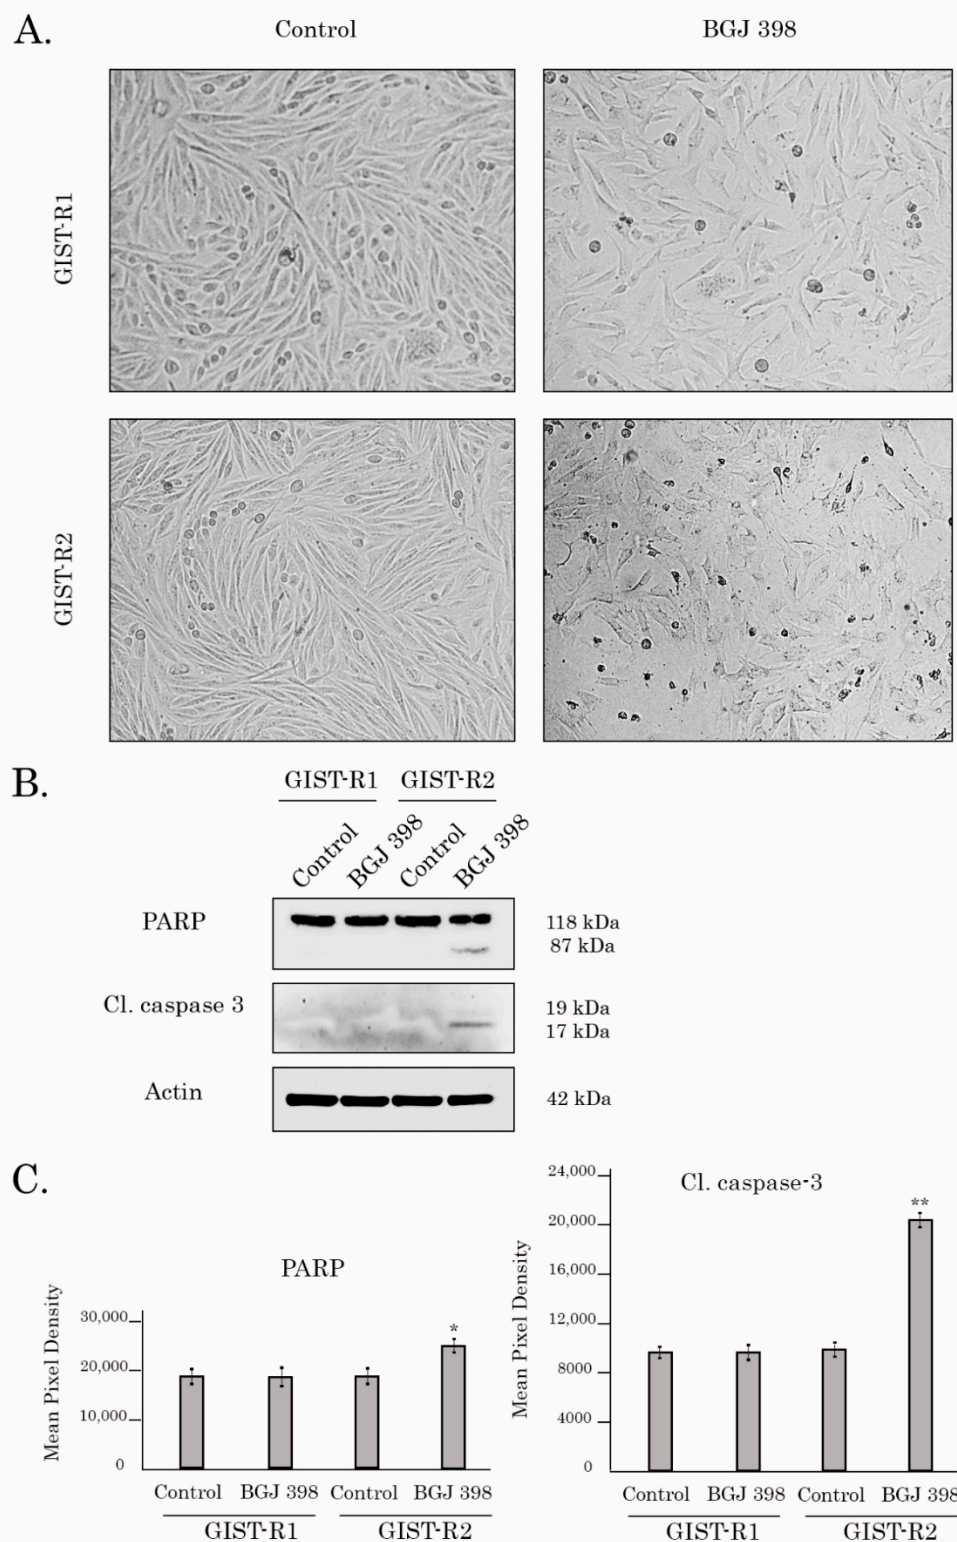

**Supplementary Figure S1.** Changes in IM-resistant GIST cells R-1 and R-2. **(A)** GIST-R1 and GIST-R2 cells were treated with solvent (DMSO) (control), BGJ 398 (1  $\mu$ M) for 48 h and subjected to the light microscopy (Leica, 10 $\times$ ). **(B)** Study of apoptosis markers (cleaved forms of PARP and caspase-3) in GIST R-1 and R-2 cells using Western blotting. Cells were cultured in the presence of BGJ398 (1  $\mu$ M) for 48 h. **(C)** Quantification by mean pixel density of cleaved forms of PARP and caspase-3 in GIST-R1 and R2 cells. Values are means  $\pm$  SD, N = 3. \*: p < 0.05, \*\*: p < 0.01 vs untreated cells.

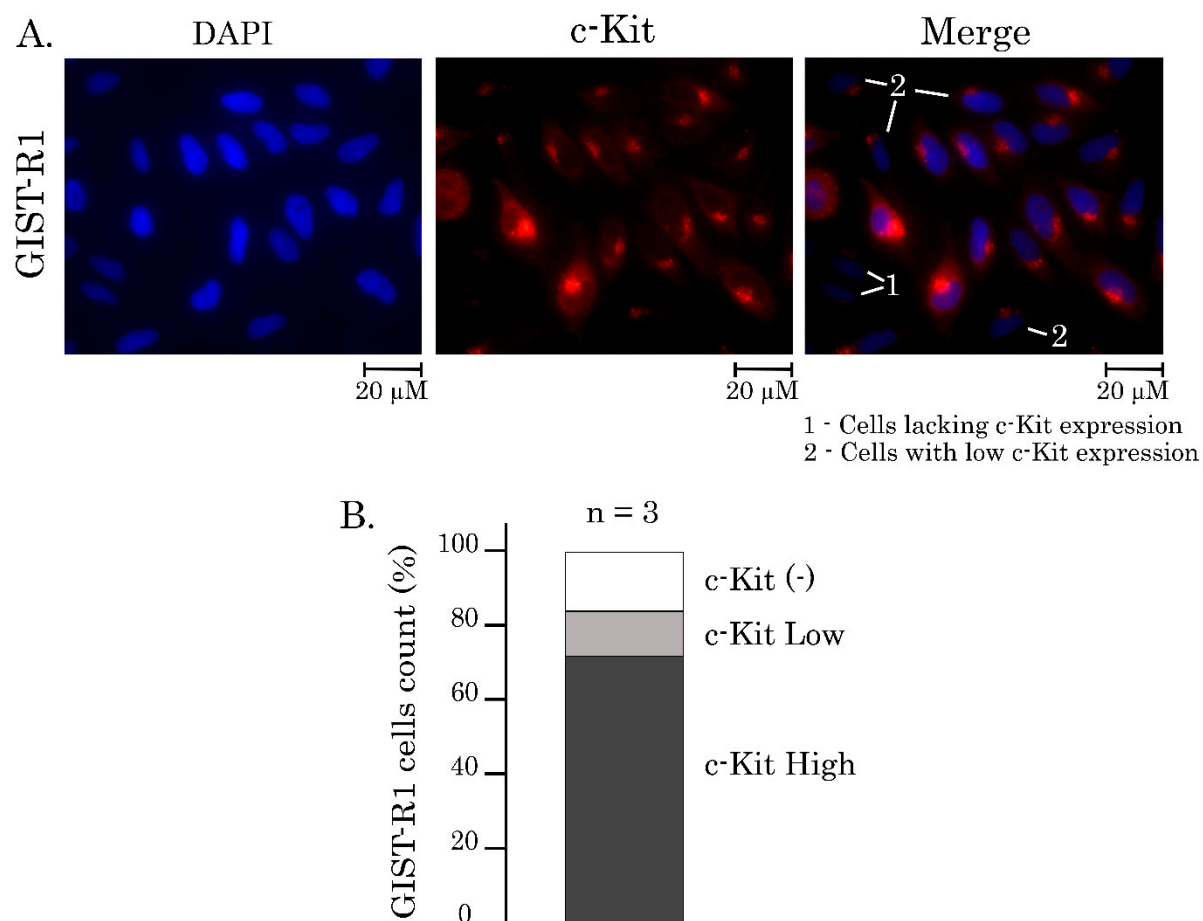

**Supplementary Figure S2.** Study of c-Kit expression in GIST-R1 cells. **(A)** Immunofluorescence staining of c-Kit expression in GIST-R1 cells. Cell nuclei were outlined by staining with DAPI. Magnification 40×, scale bars 20 μM. **(B)** The graph below demonstrates a comparative analysis of c-Kit expression in GIST-R1 cells (n = 3).

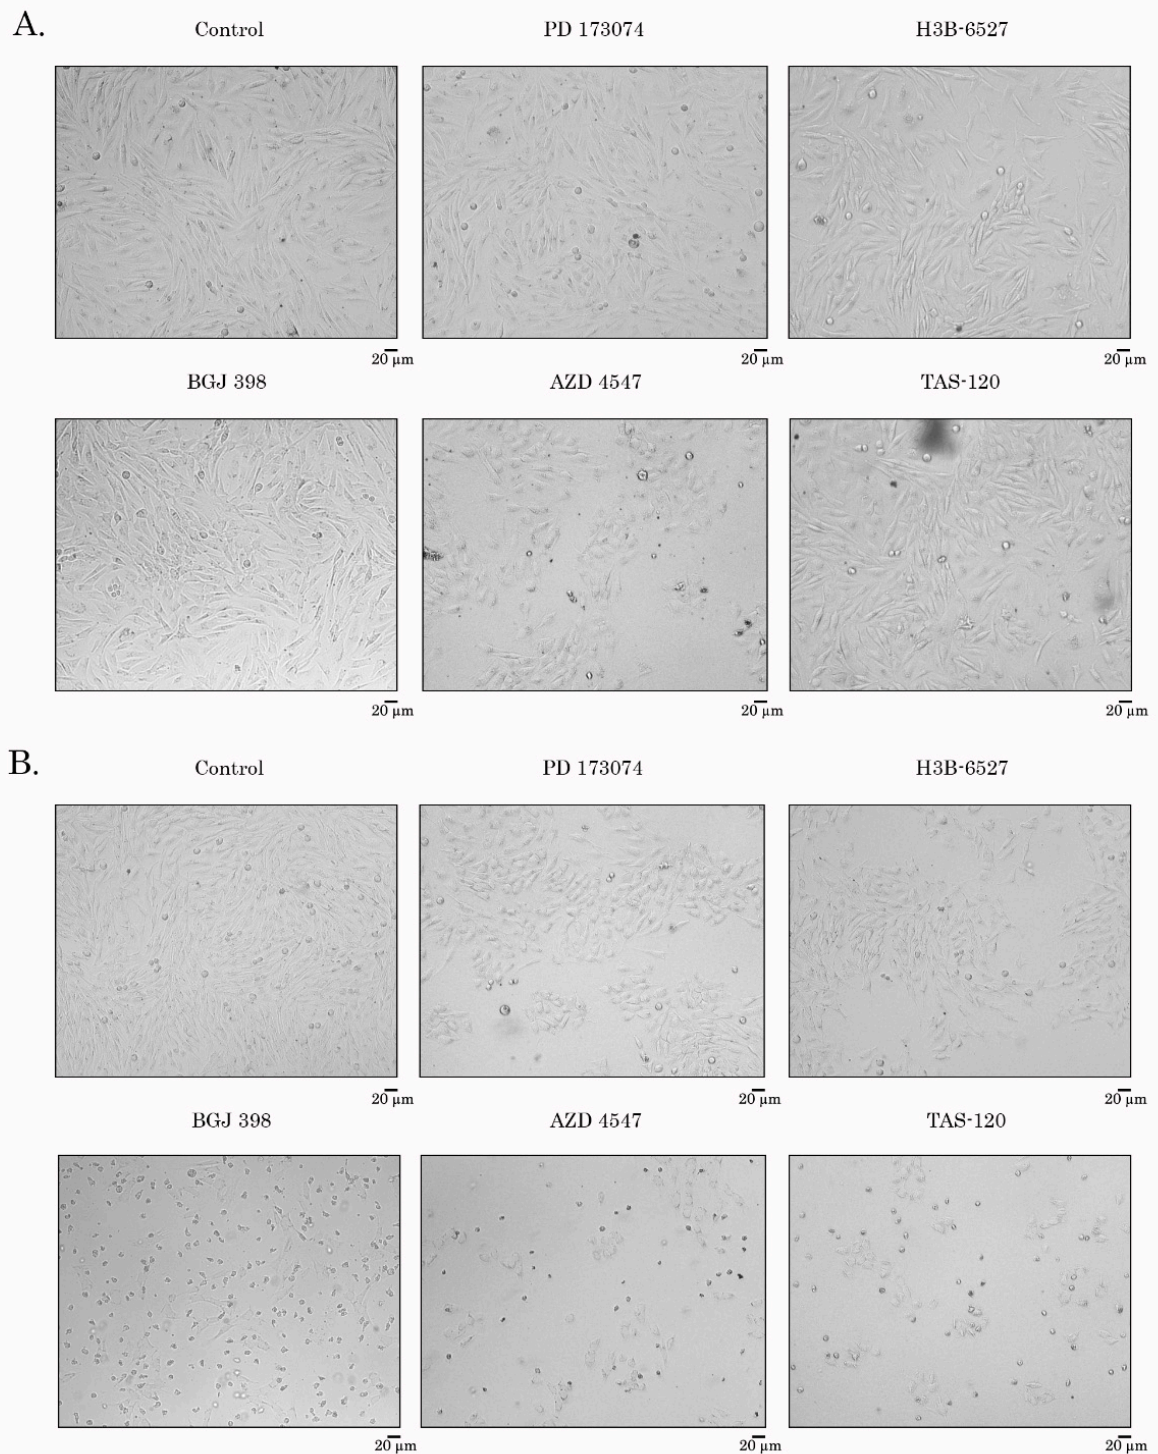

**Supplementary Figure S3.** Morphological changes in IM-resistant GIST cells treated with FGFRi. GIST-R1 (**A**) and GIST-R2 (**B**) cells were treated with solvent (DMSO) (control), PD 173074 (10  $\mu$ M), H3B-6527 (1  $\mu$ M), BGJ 398 (1  $\mu$ M), AZD 4547 (1  $\mu$ M) and TAS-120 (1  $\mu$ M) for 48 h and subjected to the light microscopy.

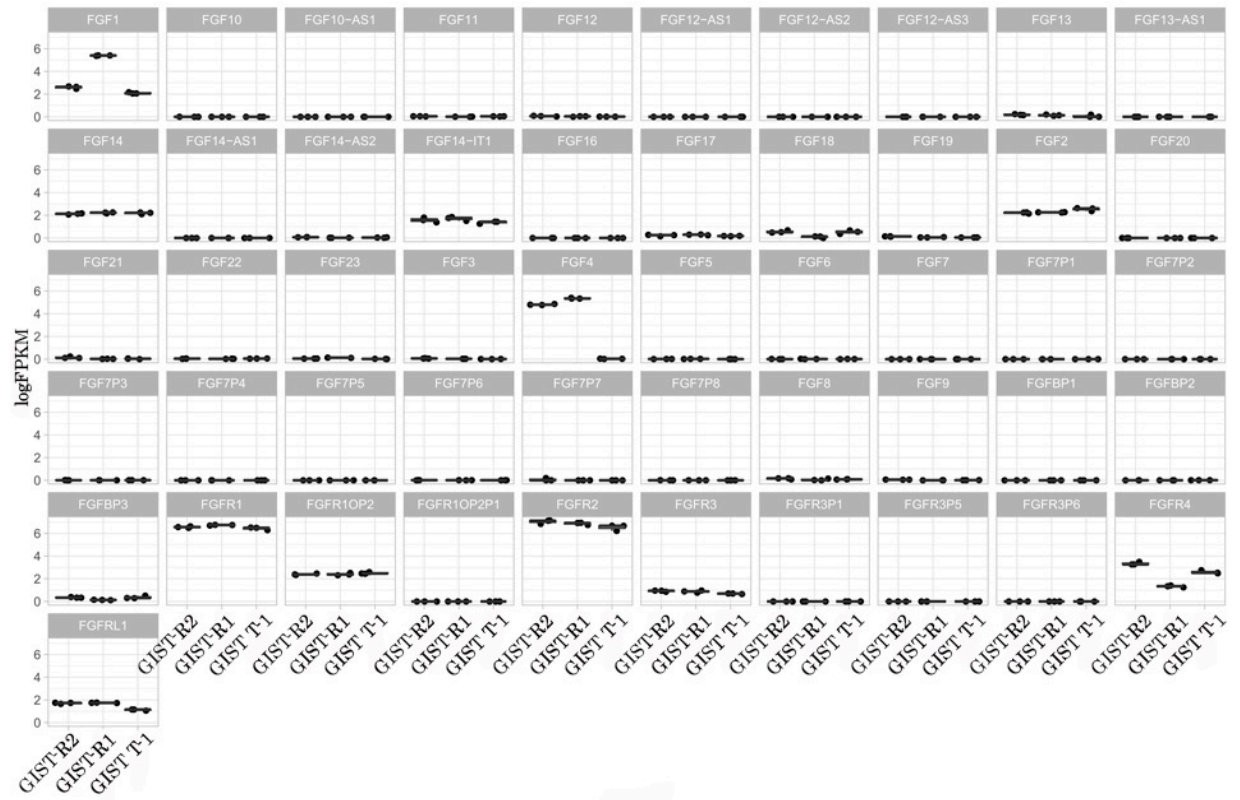

**Supplementary Figure S4.** Expression profiles of *FGF* and *FGFR* genes.

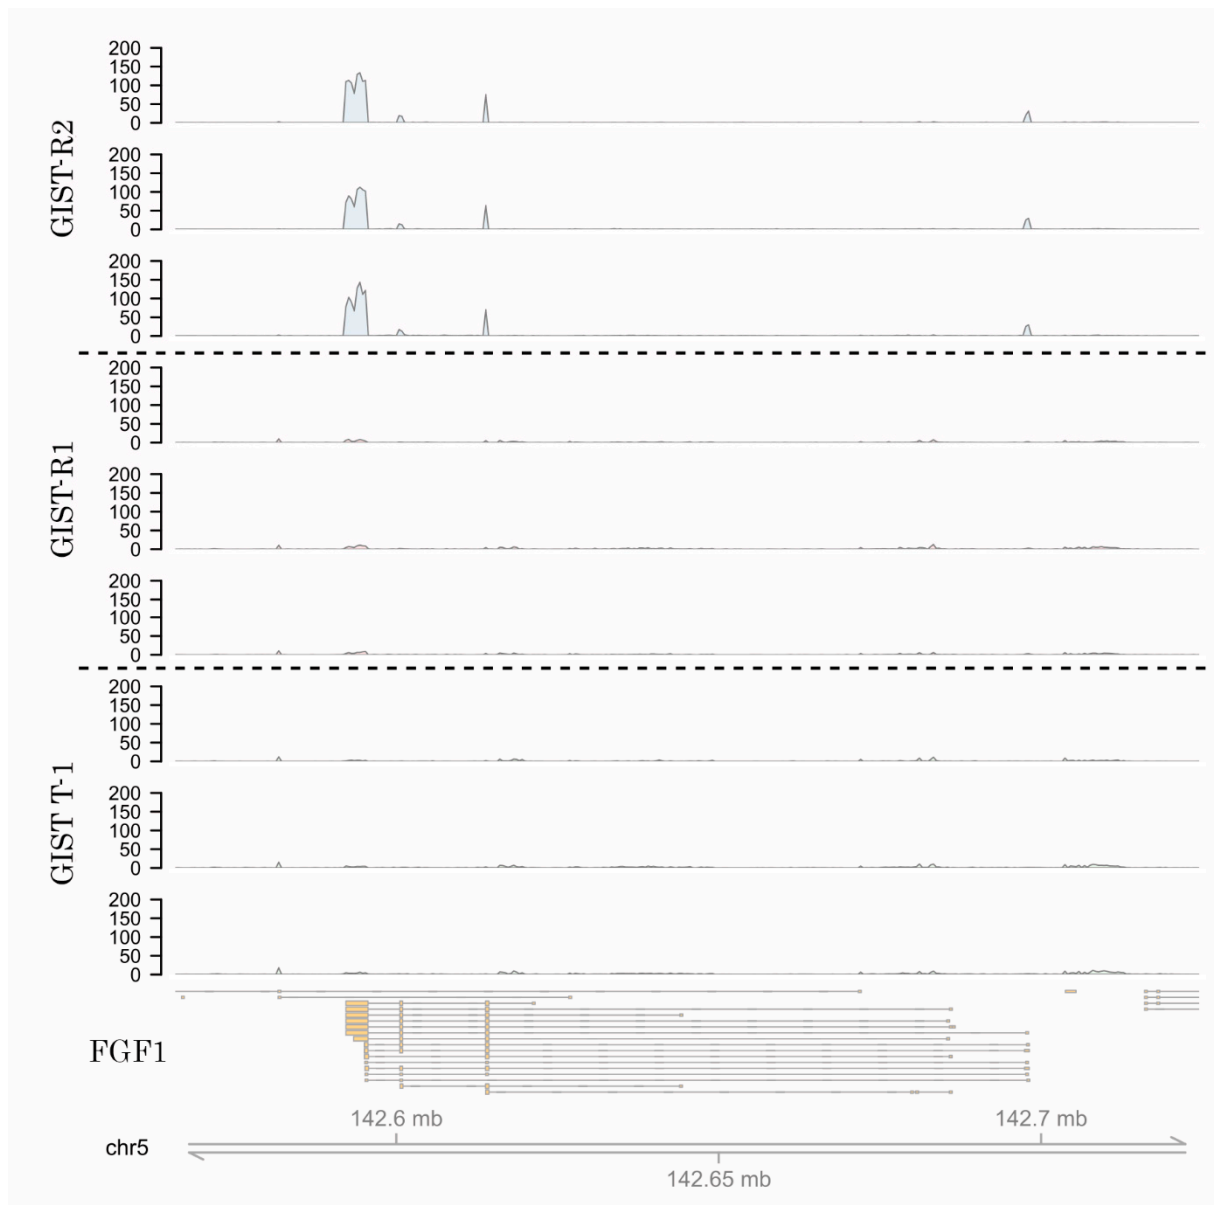

**Supplementary Figure S5.** Genomic view on *FGF1* gene showing its coverage in GIST cell lines.

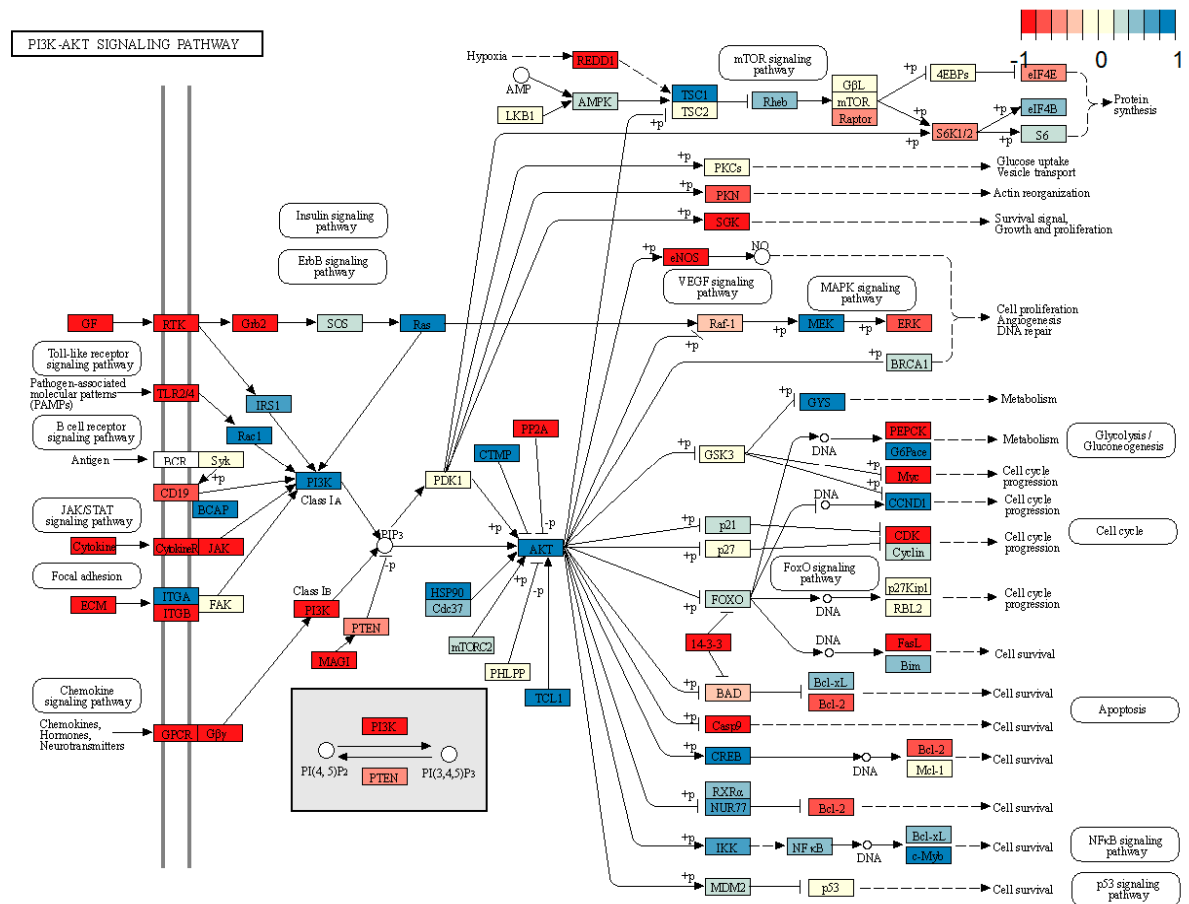

**Supplementary Figure S6.** PI3K-AKT signaling pathway changes between GIST-R1 cells (red, scaled expression < 0) and GIST-R2 cells (blue, scaled expression > 0).



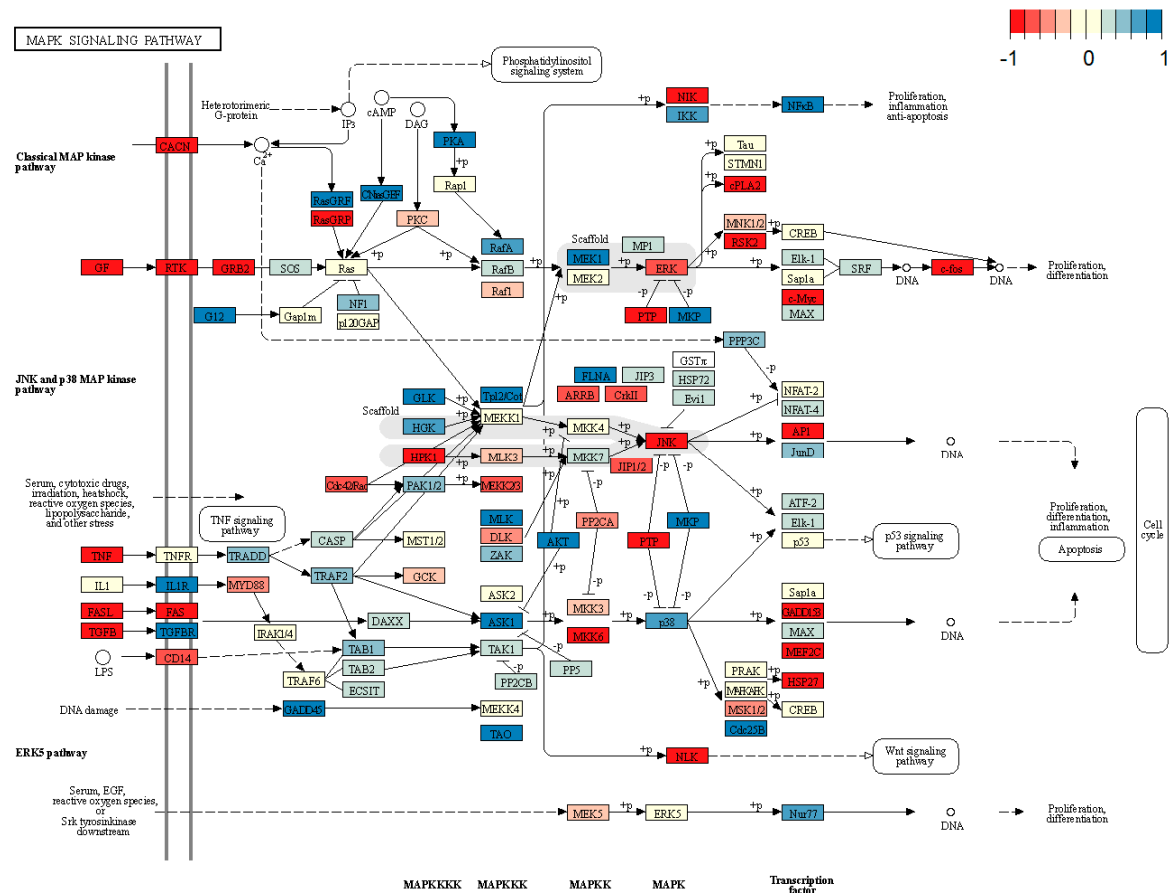

**Supplementary Figure S7.** MAPK signaling pathway changes between GIST-R1 cells (red, scaled expression < 0) and GIST-R2 cells (blue, scaled expression > 0).

A.

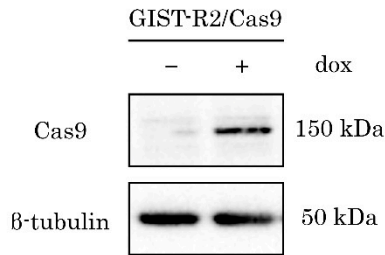

B.

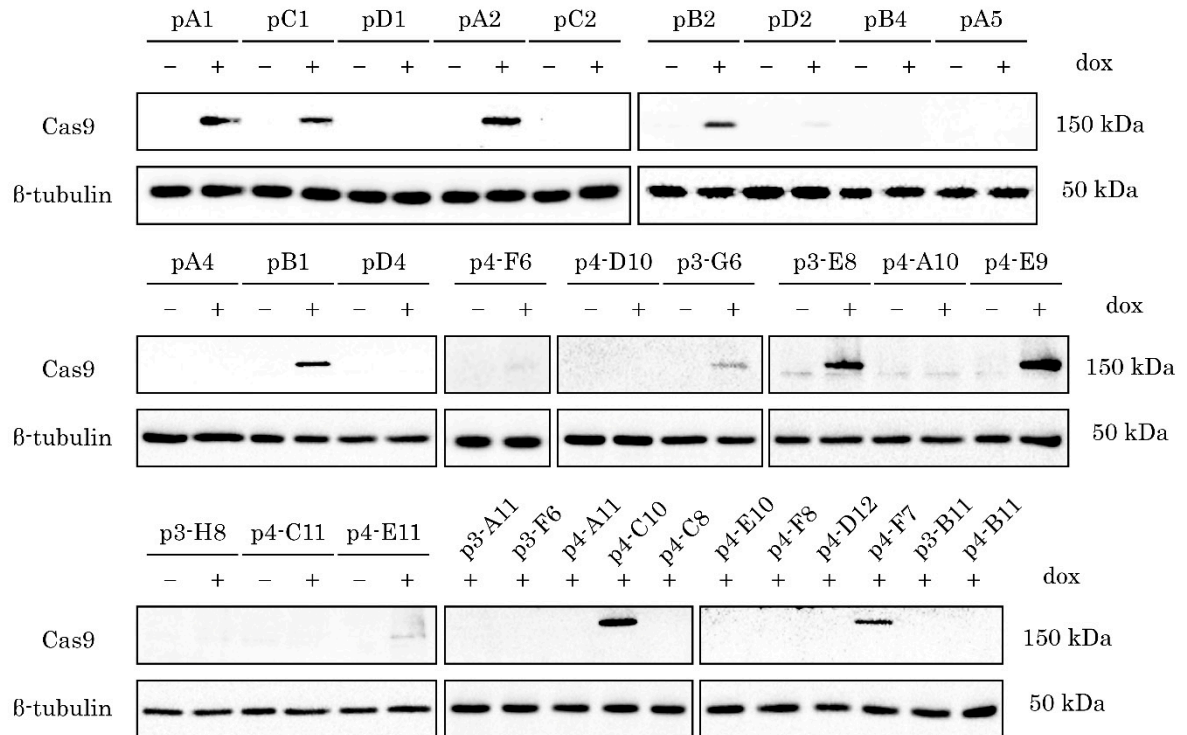

C.

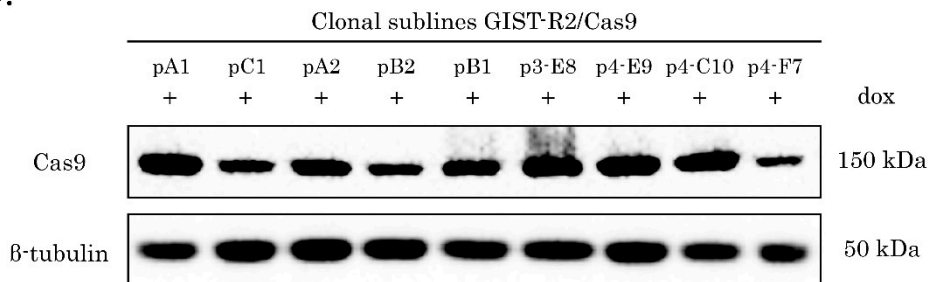

**Supplementary Figure S8.** Development of GIST-R2 cells expressing doxycycline-dependent endonuclease Cas9. **(A)** Expression of the doxycycline-dependent endonuclease Cas9 in GIST-R2/Cas9 cells after lentiviral transduction and puromycin selection. Cas9 expression was induced in the presence of 1  $\mu$ g/ml doxycycline for 6 days. **(B)** Expression of the doxycycline-dependent endonuclease Cas9 in GIST-R2/Cas9 clonal sublines. Cas9 expression induction was induced in the presence of 1  $\mu$ g/ml doxycycline as indicated before. **(C)** Comparative analysis of expression of the doxycycline-dependent endonuclease Cas9 in GIST-R2/Cas9 clonal sublines pA1, pC1 pA2, pB2, pB1, p3-E8, p4-E9, p4-C10 and p4-F7. Induction of Cas9 expression was performed as indicated before. Dox – doxycycline.  $\beta$ -tubulin was amplified as an internal control.



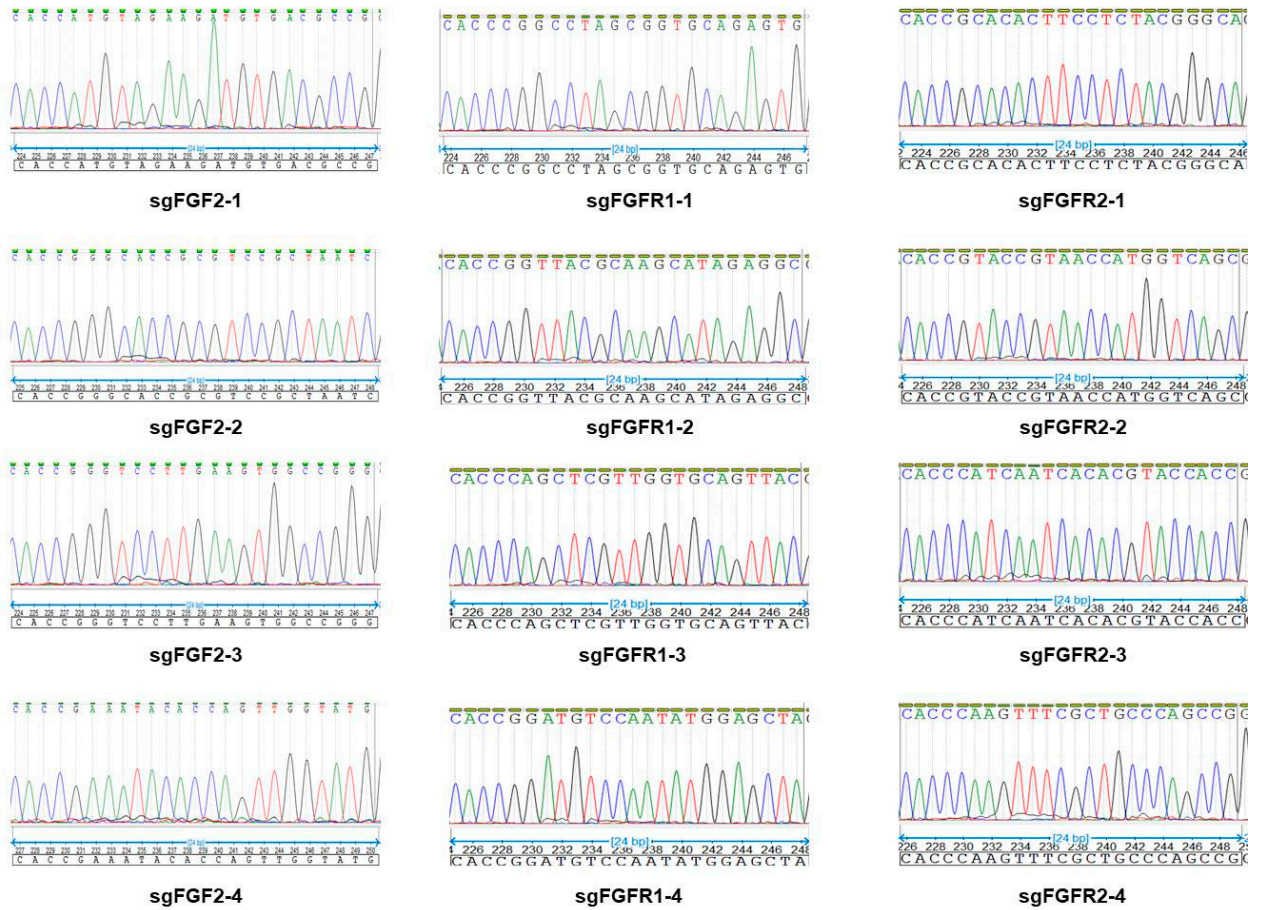

**Supplementary Figure S9.** Results of Sanger sequencing proving the inserts, which encode sgRNA against *FGF2*, *FGFR1* and *FGFR2* genes (Supplementary Table S1). Data processing was performed in Unipro UGENE 42.0 program software [26-28].

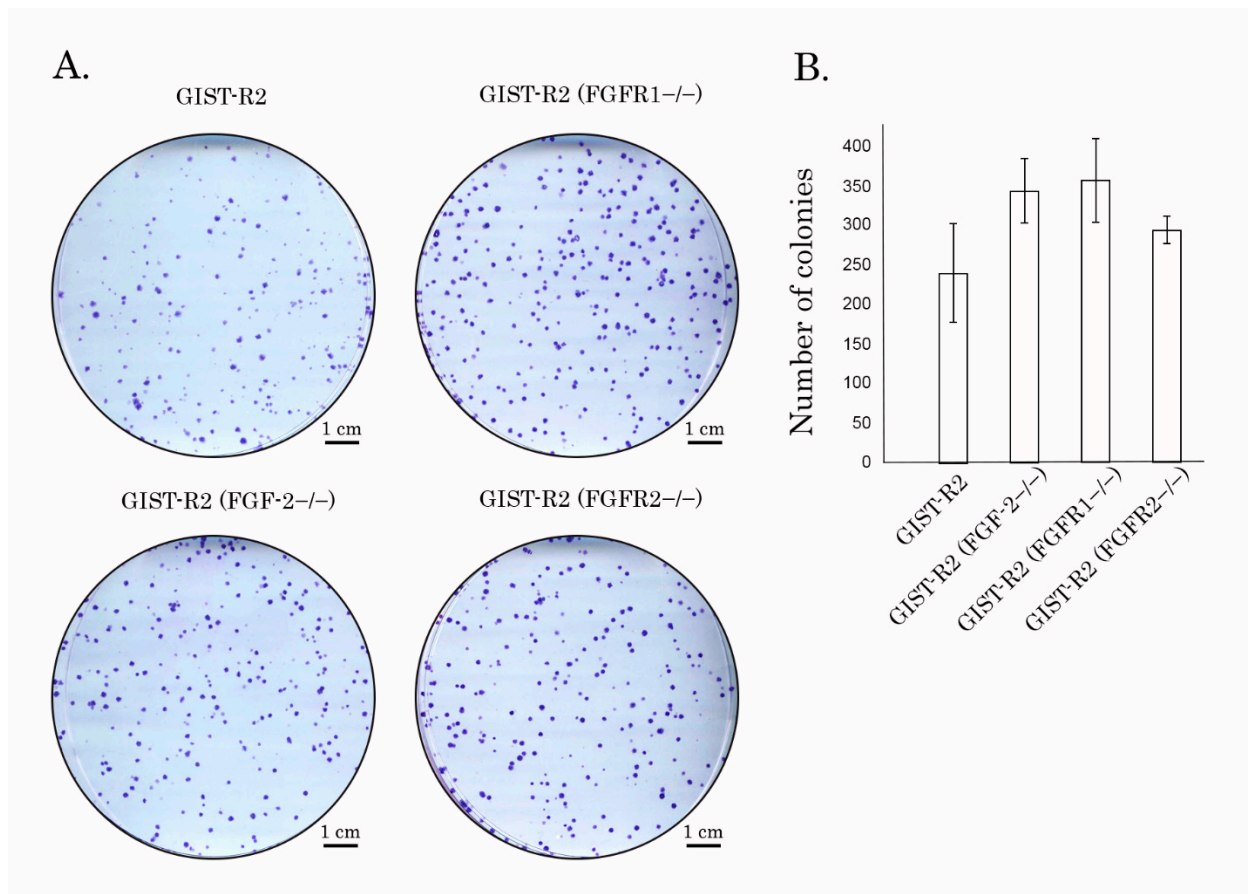

**Supplementary Figure S10.** Ability of GIST-R2 cells and knockout cells lines (FGF-2<sup>-/-</sup>, FGFR1<sup>-/-</sup>, FGFR2<sup>-/-</sup>) to form the colonies. **(A)** Representative images of the colony formation assay of GIST-R2 cells and knockout cells lines (FGF-2<sup>-/-</sup>, FGFR1<sup>-/-</sup>, FGFR2<sup>-/-</sup>). **(B)** Quantification of the colonies in GIST-R2 cells and knockout cells lines (FGF-2<sup>-/-</sup>, FGFR1<sup>-/-</sup>, FGFR2<sup>-/-</sup>). Data are presented as a median ± SD (n=4).

**Supplementary Table S1.** Nucleotide sequences of sgRNA oligos for the development of the Cas9-mediated knockout of FGF-2, FGFR1, FGFR2 genes

| Target       | sgRNA name | Sequences of the forward (F) and reverse (R) sgRNA oligos<br><b>CACC, AAAC</b> – nucleotides for cloning | Source                                               |
|--------------|------------|----------------------------------------------------------------------------------------------------------|------------------------------------------------------|
| <i>FGF-2</i> | F2-1       | F: 5'–<br><b>CACCATGTAGAAGATGTGACGCCG</b> –3'<br>R: 5'– <b>AAAC</b> CGGCGTCACATCTTCTACAT–<br>3'          | Thermo Fisher Scientific<br>ID<br>CRISPR747906_SGM   |
|              | F2-2       | F: 5'–<br><b>CACCGGGCACC</b> CGTCCGCTAATC–3'<br>R: 5'–<br><b>AAAC</b> GATTAGCGGACGCGGTGCCC–3'            | Genscript<br>ID: FGF2 crRNA 1                        |
|              | F2-3       | F: 5'–<br><b>CACCGGGTCCTTGAAGTGGCCGGG</b> –3'<br>R: 5'–<br><b>AAAC</b> CCCGGCCACTTCAAGGACCC–3'           | [19]                                                 |
|              | F2-4       | F: 5'– <b>CACCG</b> AAATACACCAGTTGGTATG–<br>3'<br>R: 5'– <b>AAAC</b> CATACCAACTGGTGTATTTC–<br>3'         | Genscript<br>ID: FGF2 crRNA 5                        |
| <i>FGFR1</i> | R1-1       | F: 5'–<br><b>CACCCGGCCTAGCGGTGCAGAGTG</b> –3'<br>R: 5'– <b>AAAC</b> GCCTCTATGCTTGCGTAACC–<br>3'          | [21]                                                 |
|              | R1-2       | F: 5'–<br><b>CACCCAGCTCGTTGGTGCAGTTAC</b> –3'<br>R: 5'–<br><b>AAACGTA</b> ACTGCACCAACGAGCTG–3'           | Thermo Fisher Scientific<br>ID<br>CRISPR767816_SGM   |
|              | R1-3       | F: 5'–<br><b>CACCCAGCTCGTTGGTGCAGTTAC</b> –3'<br>R: 5'–<br><b>AAACGTA</b> ACTGCACCAACGAGCTG–3'           | Genscript<br>ID: FGFR1 crRNA 2                       |
|              | R1-4       | F: 5'–<br><b>CACCGGATGTCCAATATGGAGCTA</b> –3'<br>R: 5'– <b>AAAC</b> TAGCTCCATATTGGACATCC–<br>3'          | [19]                                                 |
| <i>FGFR2</i> | R2-1       | F: 5'–<br><b>CACCGCACACTTCCTCTACGGGCA</b> –3'<br>R: 5'–<br><b>AAAC</b> TGCCCCGTAGAGGAAGTGTGC–3'          | Thermo Fisher Scientific<br>ID<br>CRISPR1089779_SGM) |
|              | R2-2       | F: 5'–                                                                                                   | [22]                                                 |

|  |      |                                                                                                            |                                 |
|--|------|------------------------------------------------------------------------------------------------------------|---------------------------------|
|  |      | <p><b>CACC</b>GTACCGTAACCATGGTCAGC–3’<br/> R: 5’–<br/> <b>AAAC</b>GCTGACCATGGTTACGGTAC–3’</p>              |                                 |
|  | R2-3 | <p>F: 5’–<b>CACCC</b>CATCAATCACACGTACCACC–<br/> 3’<br/> R: 5’–<br/> <b>AAAC</b>GGTGGTACGTGTGATTGATG–3’</p> | Genscript,<br>ID: FGFR2 crRNA 4 |
|  | R2-4 | <p>F: 5’–<br/> <b>CACC</b>CAAGTTTCGCTGCCCAGCCG–3’<br/> R: 5’–<br/> <b>AAAC</b>CGGCTGGGCAGCGAAACTTG–3’</p>  | [19]                            |

**Supplementary Table S2.** Knockout of FGFR2 increases IC50 values of BGJ 398 in GIST-R2 cells.

| Target drug   | GIST-R2 knockout cell lines |                         |                         | GIST-R2          |
|---------------|-----------------------------|-------------------------|-------------------------|------------------|
|               | FGF-2-/-                    | FGFR1-/-                | FGFR2-/-                |                  |
| BGJ 398       | < 0.0006 $\mu$ M            | 1.21 $\mu$ M $\pm$ 0.23 | 1.93 $\mu$ M $\pm$ 0.36 | < 0.0003 $\mu$ M |
| Fold increase | 2.1                         | 5041.7                  | 8041.7                  |                  |
